# Supplementary material
Source: publisher site journal article supplement (https://www.dovepress.com/article/308097)
Supplement: Supplementary file 1 [file get_supplementary_file.php]

**Supplementary Table 1.** Multivariate logistic regression analysis of pain risk

| Items | Multivariate logistic regression model | | | |
| --- | --- | --- | --- | --- |
| *P* value | OR | 95%CI | |
| Lower | Higher |
| Interventional therapies |  |  |  |  |
| RFA | Reference | - | - | - |
| cTACE | 0.305 | 1.440 | 0.717 | 2.891 |
| DEB-TACE | 0.307 | 1.483 | 0.696 | 3.159 |
| Age≥60 years | 0.322 | 1.324 | 0.759 | 2.310 |
| Male | 0.102 | 0.554 | 0.273 | 1.125 |
| Hypertension | 0.902 | 0.962 | 0.521 | 1.776 |
| Diabetes mellitus | 0.874 | 1.074 | 0.444 | 2.597 |
| Heart disease | 0.860 | 1.098 | 0.388 | 3.112 |
| Bronchial asthma | 0.204 | 0.211 | 0.019 | 2.329 |
| Disease duration≥4 months | 0.566 | 0.832 | 0.444 | 1.558 |
| Surgery history | 0.456 | 0.776 | 0.399 | 1.509 |
| Ablation history | 0.002 | 0.314 | 0.148 | 0.663 |
| TACE history | 0.046 | 1.804 | 1.010 | 3.221 |
| Radioactive seeds implantation history | 0.861 | 1.067 | 0.519 | 2.192 |
| Tumor size≥5 cm | 0.155 | 0.660 | 0.372 | 1.170 |
| Multifocal tumor | 0.638 | 0.878 | 0.510 | 1.511 |
| Larger blood supply of tumor | 0.798 | 1.072 | 0.629 | 1.828 |
| Abnormal TBIL (≥19.0 μmol/L) | 0.797 | 0.928 | 0.524 | 1.641 |
| Abnormal ALT (≥40.0 U/L) | 0.098 | 1.803 | 0.897 | 3.623 |
| Abnormal AST (≥40.0 U/L) | 0.608 | 0.844 | 0.441 | 1.615 |
| Abnormal Cr (≥50.0 μmol/L) | 0.799 | 0.921 | 0.488 | 1.737 |
| Complete embolism/ablation | 0.932 | 0.957 | 0.353 | 2.595 |

OR, odds ratio; CI, confidence interval; RFA, radiofrequency ablation; cTACE, conventional transarterial chemoembolization; DEB-TACE, drug-eluting bead transarterial arterial chemoembolization; TACE, transarterial chemoembolization; TBIL, total bilirubin; ALT, alanine transaminase; AST, aspartate aminotransferase; Cr, creatinine.

**Supplementary Table 2.** Multivariate logistic regression analysis of fever risk

| Items | Multivariate logistic regression model | | | |
| --- | --- | --- | --- | --- |
| *P* value | OR | 95%CI | |
| Lower | Higher |
| Interventional therapies |  |  |  |  |
| RFA | Reference | - | - | - |
| cTACE | 0.090 | 1.957 | 0.900 | 4.256 |
| DEB-TACE | 0.298 | 1.560 | 0.675 | 3.604 |
| Age≥60 years | 0.087 | 0.586 | 0.317 | 1.080 |
| Male | 0.036 | 2.396 | 1.059 | 5.423 |
| Hypertension | 0.710 | 1.134 | 0.584 | 2.203 |
| Diabetes mellitus | 0.322 | 0.598 | 0.216 | 1.655 |
| Heart disease | 0.108 | 2.478 | 0.819 | 7.502 |
| Bronchial asthma | 0.791 | 1.365 | 0.137 | 13.632 |
| Disease duration≥4 months | 0.007 | 0.392 | 0.199 | 0.773 |
| Surgery history | 0.490 | 1.295 | 0.621 | 2.699 |
| Ablation history | 0.146 | 0.538 | 0.233 | 1.242 |
| TACE history | 0.637 | 0.863 | 0.468 | 1.591 |
| Radioactive seeds implantation history | 0.569 | 1.260 | 0.569 | 2.790 |
| Tumor size≥5 cm | 0.223 | 1.456 | 0.796 | 2.666 |
| Multifocal tumor | 0.072 | 1.733 | 0.953 | 3.153 |
| Larger blood supply of tumor | 0.904 | 0.965 | 0.539 | 1.727 |
| Abnormal TBIL (≥19.0 μmol/L) | 0.627 | 0.858 | 0.463 | 1.591 |
| Abnormal ALT (≥40.0 U/L) | 0.116 | 1.780 | 0.867 | 3.656 |
| Abnormal AST (≥40.0 U/L) | 0.484 | 1.278 | 0.643 | 2.543 |
| Abnormal Cr (≥50.0 μmol/L) | 0.308 | 0.702 | 0.356 | 1.385 |
| Complete embolism/ablation | 0.553 | 1.378 | 0.477 | 3.983 |

OR, odds ratio; CI, confidence interval; RFA, radiofrequency ablation; cTACE, conventional transarterial chemoembolization; DEB-TACE, drug-eluting bead transarterial arterial chemoembolization; TACE, transarterial chemoembolization; TBIL, total bilirubin; ALT, alanine transaminase; AST, aspartate aminotransferase; Cr, creatinine.

**Supplementary Table 3.** Multivariate logistic regression analysis of fatigue risk

| Items | Multivariate logistic regression model | | | |
| --- | --- | --- | --- | --- |
| *P* value | OR | 95%CI | |
| Lower | Higher |
| Interventional therapies |  |  |  |  |
| RFA | Reference | - | - | - |
| cTACE | 0.001 | 4.100 | 1.850 | 9.084 |
| DEB-TACE | 0.785 | 1.129 | 0.472 | 2.703 |
| Age≥60 years | 0.147 | 0.615 | 0.320 | 1.185 |
| Male | 0.850 | 1.082 | 0.479 | 2.444 |
| Hypertension | 0.136 | 1.674 | 0.850 | 3.298 |
| Diabetes mellitus | 0.373 | 0.608 | 0.203 | 1.816 |
| Heart disease | 0.032 | 3.580 | 1.115 | 11.487 |
| Bronchial asthma | 0.999 | - | - | - |
| Disease duration≥4 months | 0.108 | 0.550 | 0.265 | 1.140 |
| Surgery history | 0.590 | 1.230 | 0.579 | 2.613 |
| Ablation history | 0.101 | 0.502 | 0.220 | 1.145 |
| TACE history | 0.749 | 1.112 | 0.581 | 2.128 |
| Radioactive seeds implantation history | 0.463 | 1.361 | 0.598 | 3.098 |
| Tumor size≥5 cm | 0.928 | 1.030 | 0.543 | 1.952 |
| Multifocal tumor | 0.644 | 0.864 | 0.464 | 1.607 |
| Larger blood supply of tumor | <0.001 | 0.193 | 0.097 | 0.384 |
| Abnormal TBIL (≥19.0 μmol/L) | 0.308 | 1.387 | 0.739 | 2.603 |
| Abnormal ALT (≥40.0 U/L) | 0.355 | 1.448 | 0.660 | 3.176 |
| Abnormal AST (≥40.0 U/L) | 0.786 | 0.904 | 0.436 | 1.874 |
| Abnormal Cr (≥50.0 μmol/L) | 0.673 | 0.854 | 0.411 | 1.774 |
| Complete embolism/ablation | 0.020 | 5.157 | 1.301 | 20.442 |

OR, odds ratio; CI, confidence interval; RFA, radiofrequency ablation; cTACE, conventional transarterial chemoembolization; DEB-TACE, drug-eluting bead transarterial arterial chemoembolization; TACE, transarterial chemoembolization; TBIL, total bilirubin; ALT, alanine transaminase; AST, aspartate aminotransferase; Cr, creatinine.

**Supplementary Table 4.** Multivariate logistic regression analysis of nausea/vomiting risk

| Items | Multivariate logistic regression model | | | |
| --- | --- | --- | --- | --- |
| *P* value | OR | 95%CI | |
| Lower | Higher |
| Interventional therapies |  |  |  |  |
| RFA | Reference | - | - | - |
| cTACE | 0.001 | 4.548 | 1.909 | 10.839 |
| DEB-TACE | 0.157 | 2.010 | 0.764 | 5.282 |
| Age≥60 years | 0.050 | 1.908 | 0.999 | 3.646 |
| Male | 0.799 | 0.900 | 0.399 | 2.029 |
| Hypertension | 0.857 | 1.067 | 0.525 | 2.170 |
| Diabetes mellitus | 0.578 | 1.323 | 0.493 | 3.549 |
| Heart disease | 0.350 | 1.731 | 0.548 | 5.471 |
| Bronchial asthma | 0.999 | - | - | - |
| Disease duration≥4 months | 0.178 | 0.602 | 0.287 | 1.260 |
| Surgery history | 0.164 | 0.545 | 0.231 | 1.283 |
| Ablation history | 0.084 | 0.438 | 0.172 | 1.117 |
| TACE history | 0.892 | 1.048 | 0.536 | 2.049 |
| Radioactive seeds implantation history | 0.014 | 2.916 | 1.237 | 6.876 |
| Tumor size≥5 cm | 0.159 | 0.621 | 0.320 | 1.204 |
| Multifocal tumor | 0.993 | 0.997 | 0.525 | 1.894 |
| Larger blood supply of tumor | 0.897 | 0.959 | 0.511 | 1.802 |
| Abnormal TBIL (≥19.0 μmol/L) | 0.033 | 0.466 | 0.232 | 0.938 |
| Abnormal ALT (≥40.0 U/L) | 0.013 | 2.795 | 1.237 | 6.314 |
| Abnormal AST (≥40.0 U/L) | 0.291 | 0.664 | 0.311 | 1.420 |
| Abnormal Cr (≥50.0 μmol/L) | 0.454 | 0.756 | 0.364 | 1.571 |
| Complete embolism/ablation | 0.335 | 1.877 | 0.522 | 6.752 |

OR, odds ratio; CI, confidence interval; RFA, radiofrequency ablation; cTACE, conventional transarterial chemoembolization; DEB-TACE, drug-eluting bead transarterial arterial chemoembolization; TACE, transarterial chemoembolization; TBIL, total bilirubin; ALT, alanine transaminase; AST, aspartate aminotransferase; Cr, creatinine.

**Supplementary Table 5.** Multivariate logistic regression analysis of constipation risk

| Items | Multivariate logistic regression model | | | |
| --- | --- | --- | --- | --- |
| *P* value | OR | 95%CI | |
| Lower | Higher |
| Interventional therapies |  |  |  |  |
| RFA | Reference | - | - | - |
| cTACE | 0.246 | 2.149 | 0.590 | 7.827 |
| DEB-TACE | 0.799 | 0.819 | 0.176 | 3.805 |
| Age≥60 years | 0.215 | 1.961 | 0.676 | 5.692 |
| Male | 0.328 | 0.542 | 0.159 | 1.850 |
| Hypertension | 0.210 | 1.979 | 0.681 | 5.751 |
| Diabetes mellitus | 0.003 | 6.595 | 1.870 | 23.251 |
| Heart disease | 0.620 | 0.641 | 0.111 | 3.709 |
| Bronchial asthma | 0.999 | - | - | - |
| Disease duration≥4 months | 0.051 | 0.270 | 0.072 | 1.007 |
| Surgery history | 0.625 | 0.688 | 0.153 | 3.092 |
| Ablation history | 0.393 | 0.523 | 0.119 | 2.311 |
| TACE history | 0.289 | 1.822 | 0.601 | 5.521 |
| Radioactive seeds implantation history | 0.255 | 2.196 | 0.566 | 8.516 |
| Tumor size≥5 cm | 0.522 | 0.714 | 0.255 | 2.003 |
| Multifocal tumor | 0.378 | 1.627 | 0.551 | 4.802 |
| Larger blood supply of tumor | 0.893 | 0.929 | 0.318 | 2.714 |
| Abnormal TBIL (≥19.0 μmol/L) | 0.117 | 0.373 | 0.109 | 1.278 |
| Abnormal ALT (≥40.0 U/L) | 0.352 | 1.977 | 0.471 | 8.298 |
| Abnormal AST (≥40.0 U/L) | 0.204 | 0.422 | 0.111 | 1.600 |
| Abnormal Cr (≥50.0 μmol/L) | 0.901 | 1.080 | 0.320 | 3.646 |
| Complete embolism/ablation | 0.676 | 0.716 | 0.149 | 3.432 |

OR, odds ratio; CI, confidence interval; RFA, radiofrequency ablation; cTACE, conventional transarterial chemoembolization; DEB-TACE, drug-eluting bead transarterial arterial chemoembolization; TACE, transarterial chemoembolization; TBIL, total bilirubin; ALT, alanine transaminase; AST, aspartate aminotransferase; Cr, creatinine.
